# Supplementary material
Source: publisher figshare collection journal article supplement (https://sage.figshare.com/ndownloader/files/13193099)
Supplement: Supplementary file 1 [file 13193099]

## SUPPLEMENTAL APPENDIX

Table A1: Descriptive statistics (means/proportions) for various subsamples

|                                                 | Only<br>wave 1 | Wave<br>1+2 | Only<br>wave 1<br>Turks<br>Germany | Wave<br>1+2<br>Turks<br>Germany | Only<br>wave 1<br>Poles<br>Germany | Wave<br>1+2<br>Poles<br>Germany |
|-------------------------------------------------|----------------|-------------|------------------------------------|---------------------------------|------------------------------------|---------------------------------|
| Language skills                                 | 5.33           | 6.37        | 5.06                               | 6.04                            | 4.93                               | 6.11                            |
| Time-invariant<br>characteristics               |                |             |                                    |                                 |                                    |                                 |
| Relative education                              | 0.63           | 0.64        | 0.68                               | 0.68                            | 0.61                               | 0.61                            |
| Absolute education (ref.<br>ISCED 0-2)          |                |             |                                    |                                 |                                    |                                 |
| ISCED 3-4                                       | 0.42           | 0.35        | 0.27                               | 0.25                            | 0.51                               | 0.42                            |
| ISCED 5-6                                       | 0.46           | 0.54        | 0.45                               | 0.46                            | 0.44                               | 0.53                            |
| Language course before<br>migration             | 0.55           | 0.52        | 0.25                               | 0.20                            | 0.53                               | 0.59                            |
| Language improvement<br>before migration        | 0.44           | 0.52        | 0.71                               | 0.73                            | 0.33                               | 0.40                            |
| Stay in destination<br>country before migration | 0.20           | 0.26        | 0.12                               | 0.16                            | 0.40                               | 0.45                            |
| Migration motive (ref.<br>not mentioned)        |                |             |                                    |                                 |                                    |                                 |
| Family related                                  | 0.29           | 0.40        | 0.66                               | 0.75                            | 0.18                               | 0.31                            |
| Education related                               | 0.15           | 0.13        | 0.26                               | 0.19                            | 0.16                               | 0.14                            |
| Work related                                    | 0.59           | 0.53        | 0.07                               | 0.07                            | 0.71                               | 0.60                            |
| Age at migration (in<br>years)                  | 29.24          | 29.40       | 26.99                              | 27.55                           | 30.21                              | 29.46                           |
| Turkish (ref. Polish)                           | 0.25           | 0.29        |                                    |                                 |                                    |                                 |
| Female (ref. male)                              | 0.45           | 0.52        | 0.52                               | 0.45                            | 0.39                               | 0.56                            |
| Destination country (ref.<br>Germany)           |                |             |                                    |                                 |                                    |                                 |
| Ireland                                         | 0.26           | 0.26        |                                    |                                 |                                    |                                 |
| Great Britain                                   | 0.15           | 0.10        |                                    |                                 |                                    |                                 |
| N                                               | 2,426          | 2,896       | 609                                | 842                             | 825                                | 998                             |

Table A2: Variable definitions

| Name                                          | Time-varying | Definition                                                                                                                                                                                                                                                                                                                           |
|-----------------------------------------------|--------------|--------------------------------------------------------------------------------------------------------------------------------------------------------------------------------------------------------------------------------------------------------------------------------------------------------------------------------------|
| Absolute education                            | No           | Based on the ISCED-97 classification distinguishing between no education, primary and lower secondary (0-2), upper secondary (3-4), and tertiary education (5-6).                                                                                                                                                                    |
| Duration of stay                              | Yes          | Measures the difference in months between the interview date (wave 1 and wave 2) and the date of arrival.                                                                                                                                                                                                                            |
| Pre-migration investments                     |              |                                                                                                                                                                                                                                                                                                                                      |
| Language course before migration              | No           | Dummy variable with 0=No and 1=Yes.                                                                                                                                                                                                                                                                                                  |
| Language improvement before migration         | No           | Dummy variable with 0=No and 1=Yes. Language improvements are defined as any activity to improve competences in the destination language prior to migration.                                                                                                                                                                         |
| Stay in destination country before migration  | No           | Dummy variable with 0=No and 1=Yes.                                                                                                                                                                                                                                                                                                  |
| Post-migration investments / exposure         |              |                                                                                                                                                                                                                                                                                                                                      |
| Speaks destination language with friends      | Yes          | Answer categories range from 1 “never” to 5 “always.”                                                                                                                                                                                                                                                                                |
| Speaks destination language with partner      | Yes          | Answer categories range from 1 “never” to 5 “always.” Singles were assigned a value of 0.                                                                                                                                                                                                                                            |
| Improved destination language since migration | Yes          | Dummy variable with 0=No and 1=Yes. Language improvements are defined as any activity to improve competences in the destination language since migration.                                                                                                                                                                            |
| Currently receiving education                 | Yes          | Dummy variable with 0=No and 1=Yes.                                                                                                                                                                                                                                                                                                  |
| Language-intensive job                        | Yes          | Dummy variable with 0=No and 1=Yes. A language-intensive job was classified as such if it was carried out by professionals (I and II) and routine non-manuals (IIIa and IIIb) according to the Erikson-Goldthorpe-Portocarero class scheme.                                                                                          |
| Destination language media consumption        | Yes          | Respondents were asked how frequently they consume destination media TV, newspaper, and music. Answer categories range from 1 “never” to 5 “every day.” We average over the three media types.                                                                                                                                       |
| Incentives for language-related investments   |              |                                                                                                                                                                                                                                                                                                                                      |
| Migration motive                              | No           | For each of the three motives: dummy variable with 0=Not mentioned and 1=Mentioned. Respondents who mentioned a motive were openly asked about it (multiple responses possible). We include whether family-related (i.e., followed or joined family because of marriage), education-related, or work-related motives were mentioned. |

|                                         |     |                                                                                                                                                                                                                                                                                                               |
|-----------------------------------------|-----|---------------------------------------------------------------------------------------------------------------------------------------------------------------------------------------------------------------------------------------------------------------------------------------------------------------|
| Majority friends                        | Yes | Dummy variable with 0=no majority friends and 1=at least one majority friend. Based on network data where respondents listed up to four individuals to whom they feel close in the destination country (excluding close relatives). Majority members are those network members born in the receiving country. |
| Relationship status                     | Yes | 0=Single (reference), 1= Non-majority partner, 2=Majority partner                                                                                                                                                                                                                                             |
| Identification with destination country | Yes | Based on the average score of questions regarding respondents' assessment of the feeling of proudness toward the destination country (1 "very proud" to 4 "not proud at all") and its importance for their identity (1 "very important" to 4 "not important at all").                                         |
| Plans to stay indefinitely              | Yes | Dummy variable with 0=No and 1=Yes                                                                                                                                                                                                                                                                            |
| Controls                                |     |                                                                                                                                                                                                                                                                                                               |
| Age at migration                        | Yes | Measured in years                                                                                                                                                                                                                                                                                             |
| Migrant group                           | No  | Distinguishes between immigrants of Polish origin in Germany (reference), Ireland, and Great Britain and immigrants of Turkish origin in Germany                                                                                                                                                              |
| Sex                                     | No  | Dummy variable with 0=Males and 1=Females                                                                                                                                                                                                                                                                     |

Table A3: Descriptive statistics ( $N_{\text{individuals}}=3,874$ ,  $n_{\text{measurement occasions}}=5,322$ )

|                                                 | Range | Sample mean | Mean Poles | Mean Turks | Percent imputed |
|-------------------------------------------------|-------|-------------|------------|------------|-----------------|
| Language skills                                 | 0-12  | 5.90        | 6.00       | 5.63       | -               |
| Time-invariant characteristics                  |       |             |            |            |                 |
| Relative education                              | 0-1   | 0.64        | 0.63       | 0.68       | 4.4             |
| Absolute education (ref. ISCED 0-2)             |       |             |            |            | 1.6             |
| ISCED 3-4                                       | 0-1   | 0.38        | 0.42       | 0.26       |                 |
| ISCED 5-6                                       | 0-1   | 0.51        | 0.52       | 0.45       |                 |
| Language course before migration                | 0-1   | 0.53        | 0.65       | 0.22       | 8.8             |
| Language improvement before migration           | 0-1   | 0.49        | 0.40       | 0.73       | 8.8             |
| Stay in destination country before migration    | 0-1   | 0.23        | 0.27       | 0.14       | -               |
| Migration motive (ref. not mentioned)           |       |             |            |            | 0.1             |
| Family related                                  | 0-1   | 0.35        | 0.21       | 0.71       |                 |
| Education related                               | 0-1   | 0.14        | 0.11       | 0.22       |                 |
| Work related                                    | 0-1   | 0.55        | 0.74       | 0.07       |                 |
| Age at migration (in years)                     | 18-59 | 29.3        | 30.1       | 27.3       | -               |
| Turkish (ref. Polish)                           | 0-1   | 0.27        | -          | -          | -               |
| Female (ref. male)                              | 0-1   | 0.49        | 0.49       | 0.48       | -               |
| Destination country (ref. Germany)              |       |             |            |            | -               |
| Ireland                                         | 0-1   | 0.26        | 0.36       | -          |                 |
| Great Britain                                   | 0-1   | 0.12        | 0.17       | -          |                 |
| Time-varying characteristics                    |       |             |            |            |                 |
| Duration of stay (in months)                    | 0-36  | 12.29       | 12.11      | 12.76      | -               |
| Speaks destination language with friends        | 1-5   | 3.61        | 3.55       | 3.78       | 7.6             |
| Speaks destination language with partner        | 1-5   | 3.38        | 3.47       | 3.13       | 18.3            |
| Improved destination language since immigration | 0-1   | 0.67        | 0.63       | 0.80       | 7.5             |
| Currently receiving education                   | 0-1   | 0.17        | 0.15       | 0.21       | 0.4             |
| Language-intensive job                          | 0-1   | 0.03        | 0.03       | 0.03       | -               |
| Destination language media consumption          | 1-5   | 3.14        | 3.15       | 3.09       | -               |
| Identification with destination country         | 1-4   | 2.13        | 2.15       | 2.07       | 1.1             |
| Majority friends (ref. no)                      | 0-1   | 0.10        | 0.09       | 0.12       | -               |
| Relationship status (ref. single)               |       |             |            |            | 0.5             |
| Non-majority partner                            | 0-1   | 0.65        | 0.63       | 0.73       |                 |
| Majority partner                                | 0-1   | 0.08        | 0.05       | 0.15       |                 |
| Plans to stay indefinitely (ref. no)            | 0-1   | 0.26        | 0.24       | 0.30       | -               |
